# Supplementary material for: Validation of a preclinical model for assessment of drug efficacy in melanoma
Source: PubMed Central journal article supplement (PMC4914342; doi:10.18632/oncotarget.7541), 2016-02-20
Supplement: oncotarget-07-13069-s001.pdf [file oncotarget-07-13069-s001.pdf]

## Validation of a preclinical model for assessment of drug efficacy in melanoma

### Supplementary Material

**Table S1: Tumor growth parameters and metastatic potential of 8 characterized xenografted models**

| <b>Tumor xenograft</b> | <b>Origin of tumor sample</b> | <b>Mutational status</b> | <b>Tumor growth latency<sup>¶</sup> (days)</b> | <b>Doubling time (days)</b> | <b>Time to reach 1500 mm<sup>3</sup> (months)</b> |
|------------------------|-------------------------------|--------------------------|------------------------------------------------|-----------------------------|---------------------------------------------------|
| Mel-X1                 | Lymph node                    | WT                       | 35.9                                           | 5.1                         | 11.5                                              |
| Mel-X2                 | Metastasis                    | BRAF mutated             | 10                                             | 3                           | 1.5                                               |
| Mel-X3                 | Lymph node                    | BRAF mutated             | 22.5                                           | 11                          | 2.9                                               |
| Mel-X4 <sup>°</sup>    | Lymph node                    | BRAF mutated             | 26.3                                           | 10.7                        | 2.8                                               |
| Mel-X5                 | Metastasis                    | WT                       | NA                                             | NA                          | 14.3                                              |
| Mel-X6 <sup>°</sup>    | Primary site                  | BRAF mutated             | 21.3                                           | 7                           | 3.3                                               |
| Mel-X7                 | Metastasis                    | BRAF mutated             | NA                                             | NA                          | NA                                                |
| Mel-X8                 | Lymph node                    | BRAF mutated             | 27.6                                           | 6                           | 7                                                 |

The parameters were recorded after the 1<sup>st</sup> transplantation.

NA, Not available; WT, wild type for the 3 genes analyzed (*BRAF*, *NRAS*, *c-KIT*)

<sup>¶</sup> Mean time to a tumor size of 200 mm<sup>3</sup>

<sup>°</sup> Tumors derived from the same patient

**Table S2: Sites of metastasis and metastatic potential in xenografted mice**

| Tumor xenograft           | Sites of metastasis |       |       |       |         |        |        |       |       | Metastatic rate * |
|---------------------------|---------------------|-------|-------|-------|---------|--------|--------|-------|-------|-------------------|
|                           | Lymph nodes         | Lungs | Liver | Brain | Sternum | Kidney | Spleen | Ovary | Heart |                   |
| <b>Mel-X1</b>             | 0                   | 4     | 1     | 0     | 0       | 0      | 0      | 0     | 0     | Low               |
| <b>Mel-X2</b>             | 0                   | 2     | 2     | 0     | 2       | 0      | 0      | 0     | 0     |                   |
| <b>Mel-X3</b>             | 0                   | 0     | 1     | 0     | 0       | 0      | 0      | 0     | 0     |                   |
| <b>Mel-X4<sup>°</sup></b> | 0                   | 1     | 1     | 0     | 0       | 0      | 0      | 0     | 0     |                   |
| <b>Mel-X5</b>             | 0                   | 12    | 0     | 0     | 0       | 3      | 0      | 0     | 0     | High              |
| <b>Mel-X6<sup>°</sup></b> | 0                   | 3     | 4     | 0     | 0       | 0      | 0      | 0     | 0     |                   |
| <b>Mel-X7</b>             | 0                   | 7     | 6     | 0     | 1       | 0      | 0      | 0     | 0     |                   |
| <b>Mel-X8</b>             | 0                   | 4     | 1     | 1     | 0       | 2      | 1      | 0     | 0     |                   |

The metastases were assessed by systematic histological evaluation. The metastatic potential was defined as the number of metastases related to the number of mice for each model.

\* Number of metastases related to the number of mice.

<sup>°</sup> Tumours derived from the same patient

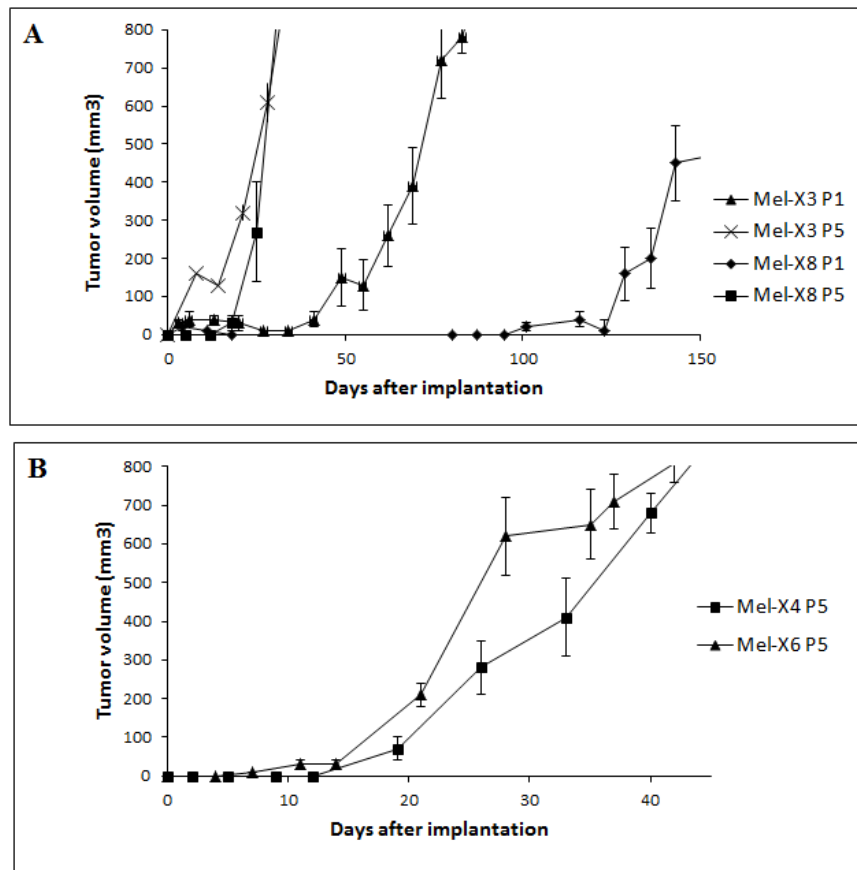

**Figure S1: Spontaneous tumor growth of patient-derived tumor xenograft.**

(A) Tumor growth curves of 2 representative xenografts (Mel-X3 and Mel-X8, respectively with low and high metastatic rate) at the first and the fifth passages. Xenografted tumors at P5 grew faster than xenografted tumors at P1 (mean tumor growth rate: 37 vs. 12 mm<sup>3</sup>/day) ( $P=0.003$ ). (B) Similar tumor growth of 2 models obtained from the same patient, respectively from the metastatic lymph node and the primary tumor (Mel-X4 and Mel-X6) (mean tumor growth rate: respectively 26 and 19 mm<sup>3</sup>/day,  $P=0.3$ ). The results are representative of 3 independent experiments. Mean±SEM.

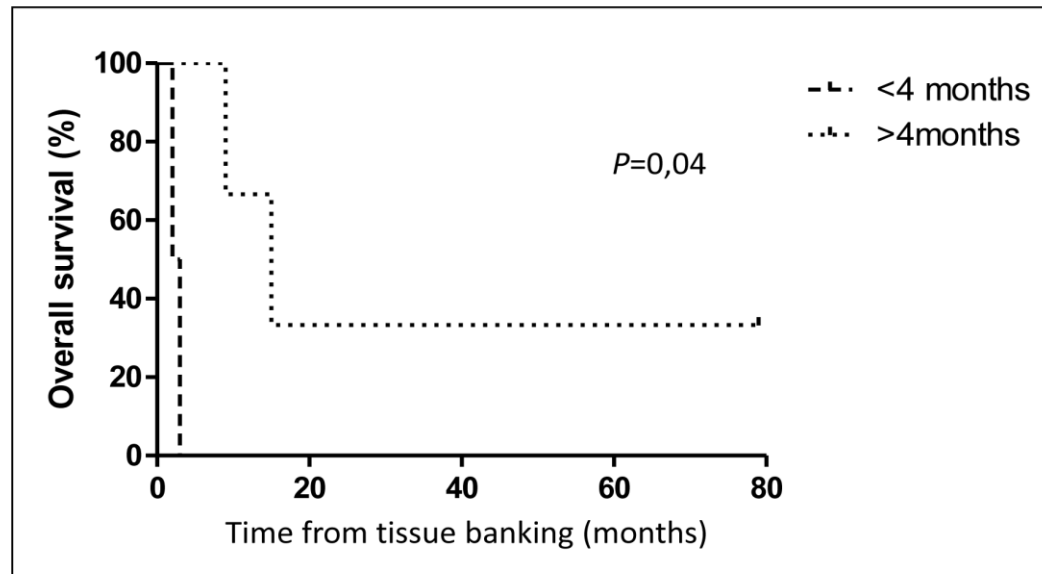

**Figure S2: Tumor growth of PDX correlates with survival in melanoma patients.**

Kaplan-Meier survival curves according to the time to reach 1500 mm<sup>3</sup> (cut-off, 4 months) for 7 melanoma PDXs.

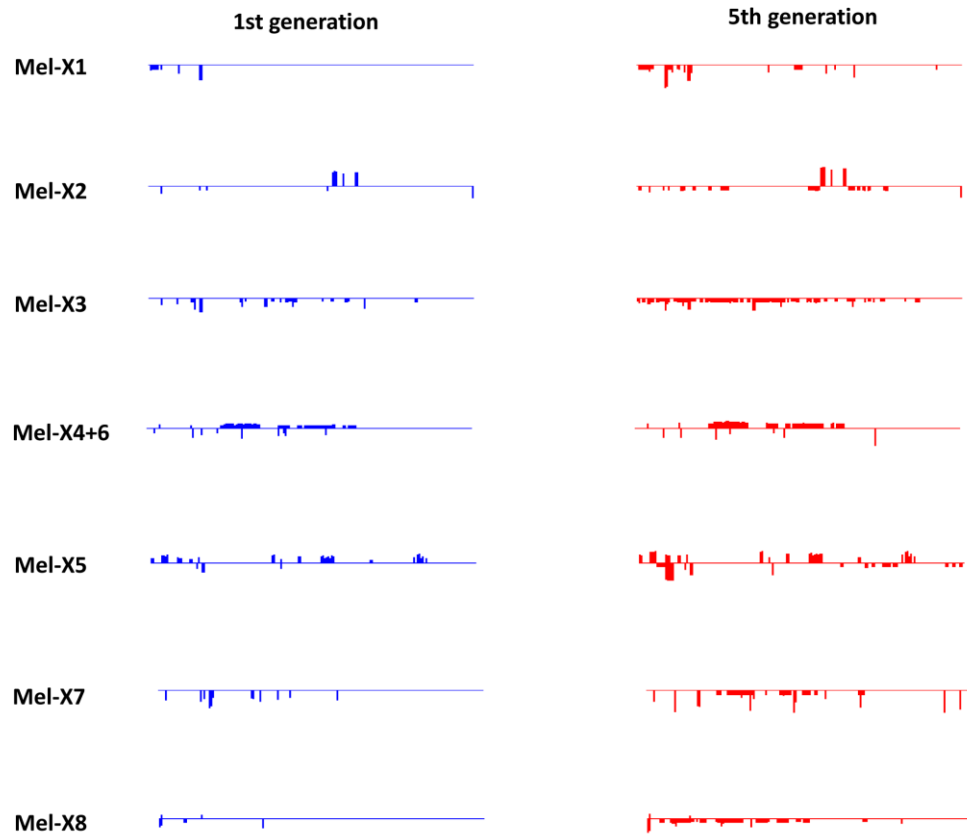

**Figure S3: Tumor array CGH profiles of 8 xenografts before and after serial passages in mice.** Loss, gain or amplification of chromosomal material compared with normal DNA are plotted on the y-axis and aligned along the x-axis in chromosomal order.
